# Supplementary material
Source: PubMed Central journal article supplement (PMC6949612)
Supplement: ijcep0012-2009-f6.pdf [file ijcep0012-2009-f6.pdf]

## SLUG and QKI in breast cancer

**Supplementary Table 1.** Survival analysis of SLUG in BC patients from K-M Plotter

| SNAI2 | High/Low  | P value | 95% CI           |
|-------|-----------|---------|------------------|
| RFS   | 1975/1976 | 0.3     | 1.06 (0.95-1.18) |
| OS    | 701/701   | 0.35    | 0.9 (0.73-1.12)  |
| DMFS  | 870/876   | 0.22    | 1.13 (0.93-1.37) |
| PPS   | 206/208   | 0.27    | 0.87 (0.69-1.11) |

**Supplementary Table 2.** Correlation of QKI mRNA expression and clinical survival of breast cancer patients with different clinicopathologic factors (from Kaplan-Meier Plotter) (Overall Survival)

| Subgroup analysis   | Patient number | HR (95% CI)      | P value |
|---------------------|----------------|------------------|---------|
| <b>Nodal status</b> |                |                  |         |
| Negative            | 297/297        | 1.25 (0.86-1.81) | 0.25    |
| Positive            | 157/156        | 0.92 (0.62-1.36) | 0.68    |
| <b>Grade</b>        |                |                  |         |
| I                   | 81/80          | 0.7 (0.27-1.8)   | 0.46    |
| II                  | 193/194        | 0.91 (0.59-1.41) | 0.67    |
| III                 | 251/252        | 1.24 (0.89-1.72) | 0.21    |
| <b>ER</b>           |                |                  |         |
| Negative            | 125/126        | 1.16 (0.74-1.84) | 0.51    |
| Positive            | 274/274        | 1.29 (0.9-1.85)  | 0.17    |
| <b>PR</b>           |                |                  |         |
| Negative            | 45/44          | 0.9 (0.35-2.27)  | 0.82    |
| Positive            | 41/42          | 0.96 (0.26-3.62) | 0.96    |
| <b>HER2</b>         |                |                  |         |
| Negative            | 65/65          | 0.78 (0.33-1.83) | 0.56    |
| Positive            | 64/65          | 1.45 (0.7-2.99)  | 0.31    |

**SupplementaryTable 3.** Different QKI probes and the corresponding survival analysis result from K-M Plotter

| AFFY ID      | RFS<br>p value | No. of patients<br>high/low | OS<br>p value | No. of patients<br>high/low | DMFS<br>p value | No. of patients<br>high/low | PPS<br>p value | No. of patients<br>high/low |
|--------------|----------------|-----------------------------|---------------|-----------------------------|-----------------|-----------------------------|----------------|-----------------------------|
| 212265_at    | 0.019*         | 1975/1976                   | 0.035*        | 700/702                     | 0.061           | 873/873                     | 0.00082*       | 207/207                     |
| 236154_at    | 2e-05*         | 864/900                     | 0.36          | 305/321                     | 0.94            | 324/340                     | 0.51           | 87/86                       |
| 212263_at    | 0.77           | 1972/1979                   | 0.52          | 701/701                     | 0.87            | 873/873                     | 0.18           | 207/207                     |
| 212636_at    | 0.11           | 1973/1978                   | 0.3           | 700/702                     | 0.17            | 873/873                     | 0.35           | 207/207                     |
| 1555154_a_at | 0.76           | 467/510                     | 0.9           | 314/314                     | 0.048*          | 331/333                     | 0.85           | 87/86                       |
| 212262_at    | 0.19           | 1973/1978                   | 0.16          | 701/701                     | 0.32            | 870/876                     | 0.18           | 207/207                     |
| 214541_s_at  | 0.0036*        | 1773/2178                   | 0.33          | 669/733                     | 0.95            | 825/921                     | 0.81           | 193/221                     |
| 214543_x_at  | 0.013*         | 1974/1977                   | 0.53          | 700/702                     | 0.67            | 870/876                     | 0.78           | 207/207                     |
| 228540_at    | 5.1e-06*       | 880/884                     | 0.87          | 313/313                     | 0.59            | 328/326                     | 0.17           | 85/88                       |

\*P < 0.05. P value in blue color means higher QKI mRNA expression was related to better prognosis; P value in red color means high QKI mRNA expression was related to worse prognosis.

# SLUG and QKI in breast cancer

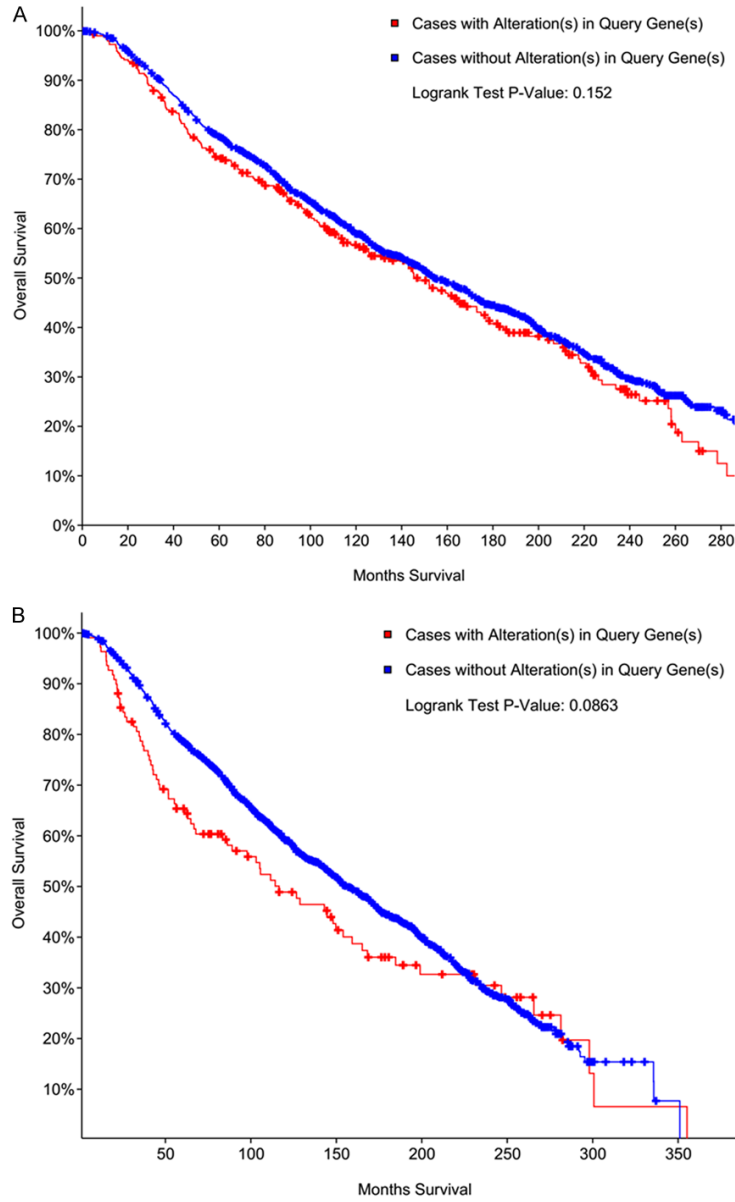

**Supplementary Figure 1.** Kaplan-Meier overall survival analysis of patients with or without gene alterations of (A) SLUG or (B) QKI.
